# Supplementary material for: Direct support mixture painting, using Pd(0) organo-metallic compounds – an easy and environmentally sound approach to combine decoration and electrode preparation for fuel cells
Source: Royal Society of Chemistry journal article supplement (doi:10.1039/c4ta04273e), 2014-01-01
Supplement: c4ta04273e1.pdf [file c4ta04273e1.pdf]

Supporting information:

5

**Direct support mixture painting, using Pd(0) organo-metallic compounds – an easy and environmentally sound approach to combine decoration and electrode preparation for fuel cells**

10

**Florian Nitze, Robin Sandström, Hamid Reza Barzegar, Guangzhi Hu, Marta Mazurkiewicz, Artur Malolepszy, Leszek Stobinski and Thomas Wågberg**

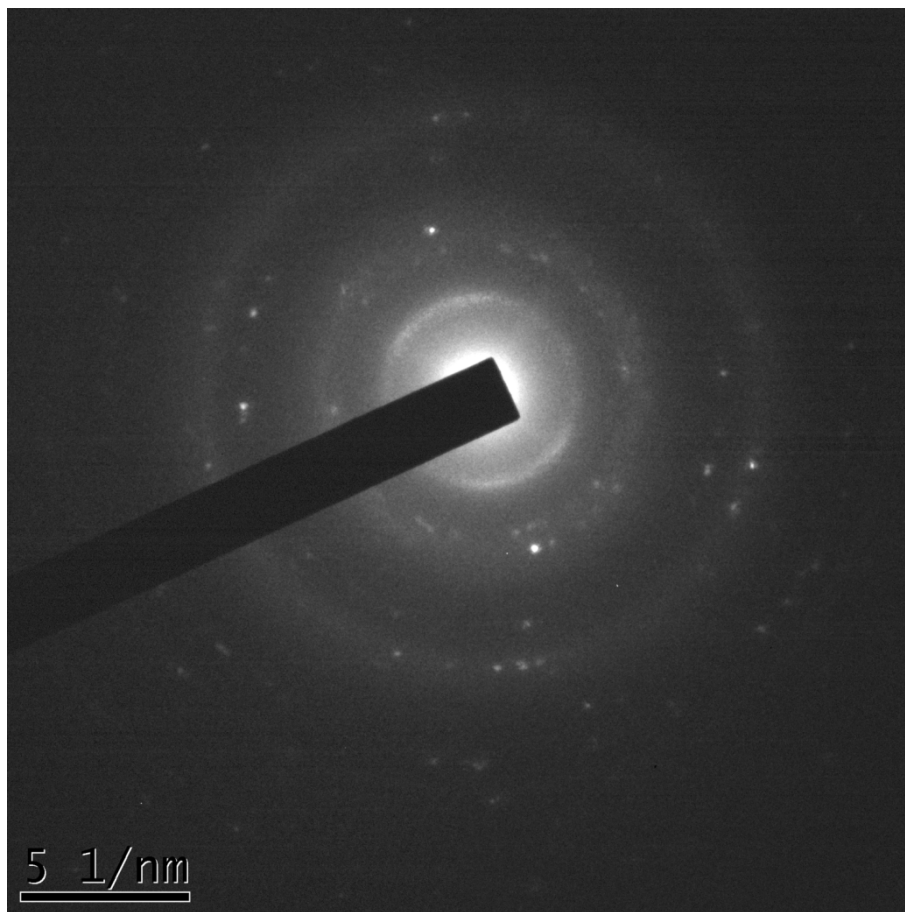

15

**Supporting information Fig. 1:** Selected area electron diffraction of Pd nanoparticle decorated helical carbon nanofibers. The ring-like diffraction pattern represents a multi-particle crystalline sample of fcc palladium

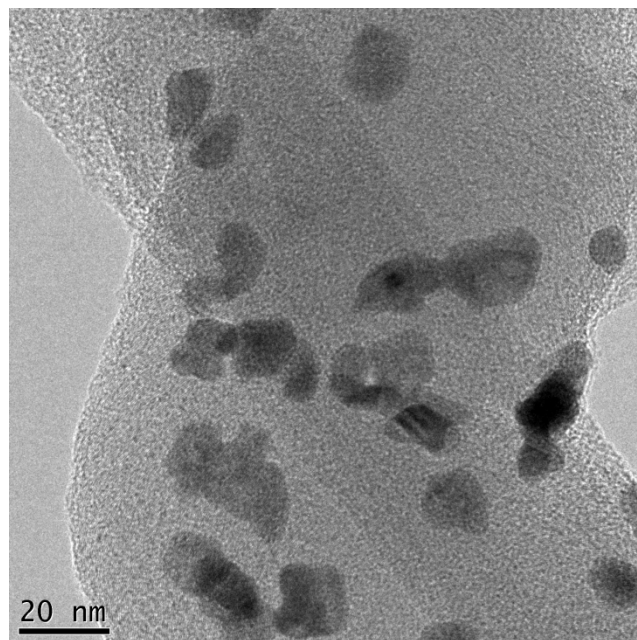

**Supporting information Fig. 2:** Pd on HCNFs after use as fuel cell catalyst. From TEM images we cannot identify any significant difference to the fresh catalyst.

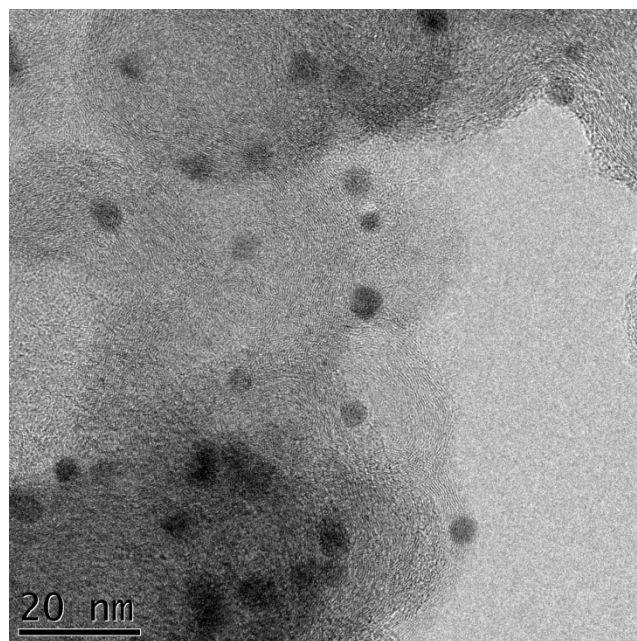

**Supporting information Fig. 3:** Pd on Vulcan after use as fuel cell catalyst. From TEM images we cannot identify any significant difference to the fresh catalyst.

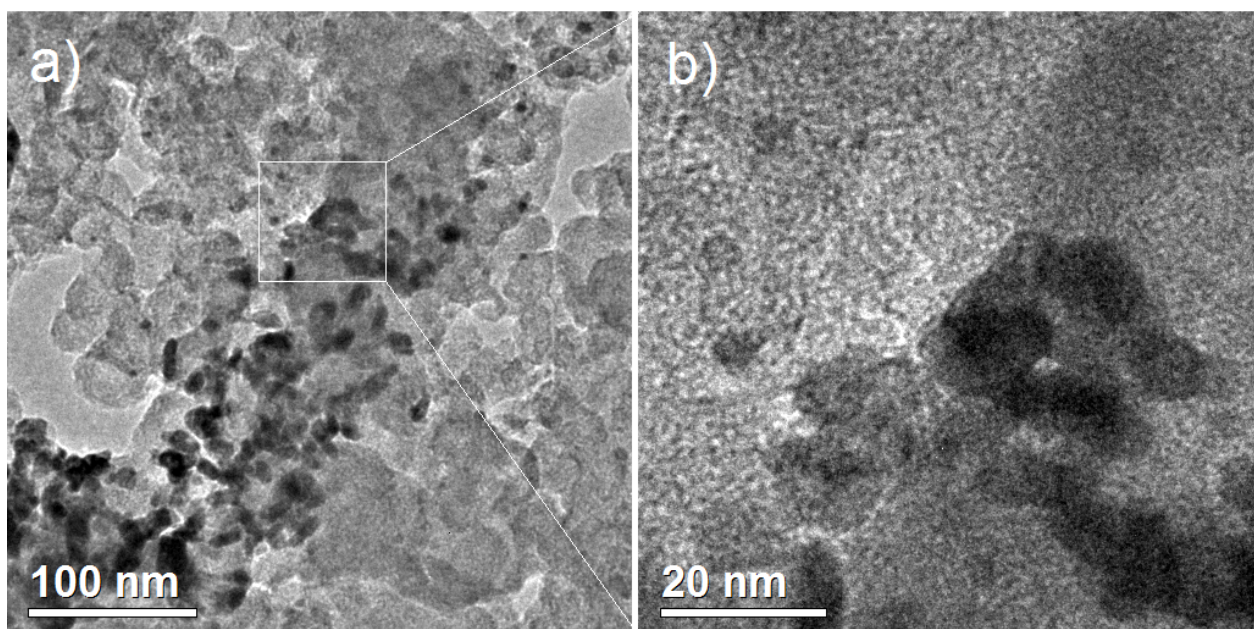

**Supporting information Fig. 4:** TEM images of Pd on Vulcan showing a region with larger particles a) and a close-up b) where the smaller NPs are also visible. The occurrence of such regions contributes to the larger average particle size derived from XRD for the Vulcan electrode.
